# Supplementary material
Source: publisher figshare collection journal article supplement (https://frontiersin.figshare.com/ndownloader/files/13149335)
Supplement: Supplementary file 1 [file 13149335]

## Sheet: Blatt1
Supplementary Table S3
Physical characeristics of the alpine soils. The data sources are the same as in the supplementary Table 1; d50 = median grain size of the range clay to mid-sand.
									Grain size distribution
Site/Profile	Profile name	Soil age (y)	Horizon	Depth	Soil skeleton	Soil skeleton	Bulk density	Thickness	Sand	Silt	Clay	d50
				(cm)	(w%)	(vol-%)	(g/cm3)	cm	(g/kg)	(g/kg)	(g/kg)	(µm)
European Alps
Morteratsch	S1	138	O	0-6	41	0.0498329	0.2	6				109.016
			A	6-9	50	0.376471	1.6	3	777	184	39
			BC	9-14	53	0.405063	1.6	5	830	158	12
			C	14-30	40	0.311688	1.8	16	757	222	21
	S2	128	A	0-10	64	0.484324	1.4	10	754	204	42	91.6669
			AC	10-40	68	0.546039	1.5	30	695	272	33
	S3	108	A	0-3	54	0.327634	1.1	3	667	265	68	73.9207
			AC	3-15	70	0.599496	1.7	12	677	281	42
	S4	98	A	0-1	55	0.269525	0.8	1				216.149
			AC	1-5	51	0.400369	1.7	4	939	61	15
			C	5-30	70	0.584856	1.6	25	931	57	12
	S5	68	A1	0-1	7	0.0222178	0.8	1				45.4364
			A2	1-4	1	0.00568505	1.5	3	530	432	38
			C1	4-9	36	0.229091	1.4	5	573	387	40
			C2	9-20	64	0.547009	1.8	11	570	372	58
	S6	48	A	0-3	64	0.517695	1.6	3				154.107
			C	3-25	68	0.576846	1.7	22	852	129	19
	S7	48	A	0-4	26	0.156559	1.4	4				136.796
			C1	4-11	37	0.261773	1.6	7	823	146	31
			C2	11-34	67	0.605103	2	23	747	211	42
	S8	58	OA	0-12	63	0.391183	1	12				86.7962
			C	12-33	48	0.38537	1.8	21	712	220	68
	S9	73	O	0-3	44	0.129108	0.5	3				117.122
			AC	3-10	65	0.512484	1.5	7	785	175	40
			C	10-36	58	0.469747	1.7	26	832	133	35
	S10	78	A1	0-2	49	0.178669	0.6	2				112.645
			A2	2-10	68	0.576846	1.7	8	818	143	39
			AC	10-25	84	0.771058	1.7	15	733	219	48
	AS19	35	AC	0-4	53	0.373333	1.4	4				120
	AS20	35	AC	0-4	66	0.506301	1.4	4				120
	AS21	35	AC	0-4	77	0.638815	1.4	4	800	190	10	120
	AS22	30	AC	0-4	53	0.373333	1.4	4				120
	AS23	30	AC	0-4	66	0.506301	1.4	4				120
	AS24	20	AC	0-4	77	0.638815	1.4	4	790	200	10	120
	AS28	3	AC	0-3	75	0.613139	1.4	4				120
	AS29	3	AC	0.3	72	0.576	1.4	4				120
	1	140	(C)A1	0-2	11	0.0445615	1	2	550	360	90	39.7271
			(C)A1	2-8	11	0.0445615	1	6	550	360	90
			2C	8-14	19	0.103196	1.3		490	420	90
			3C	14-23	70
	2	120	A	0-3	40	0.273973	1.5	3	754	204	42	91.6669
			C	3-13	65	0.512484	1.5		695	272	33
	3	100	A	0-2	40	0.273973	1.5	2	667	265	68	73.9207
			C	2-26	70	0.569106	1.5		677	281	42
	4	80	A	0-2	15	0.0682523	1.1	2				149.678
			AC	2-6	70	0.569106	1.5	4	850	120	30
			(B)C	6-8	75	0.629371	1.5	2	850	120	30
			C	8-14	75	0.613139	1.4		840	140	20
	5	70	A	0-3	40	0.246445	1.3	3	818	143	39	111.947
			C	3-22	68	0.510393	1.3		730	220	50
	6	60	CA	0-12	55	0.408922	1.5	12	850	130	20	152.842
	7	30	AC	0-6	53	0.38961	1.5	6	920	60	20	160.375
			C	6-25	70	0.552113	1.4		830	140	30
	8	30	(A)C	0-15	66	0.539601	1.6	15	820	170	10	135.505
	9	20	(A)C	0-18	77	0.694563	1.8	18	750	220	30	101.753
	A	140	A	0-7	65	0.495238	1.4	7	770	190	40	140
			(B)A	7-25	59	0.507814	1.9	18	780	190	30
			C	>25	64	0.560369	1.9		780	190	30
	AC	1300	Ah	0-10	21	0.083647	0.91	10	508	387	105	36
			AB	15-25	46	0.291514	1.28	25
			BC	40-45	60	0.468938	1.56	5	615	312	73
	AP	12460	Oh	0-5	14	0.0468423	0.8	5				71.5
			E	5-15	30	0.178113	1.34	10	542	375	83
			Bs1	15-25	55	0.415298	1.54	25	786	184	3
			Bs2	25-65	57	0.45515	1.67	30
			BC	65 - 105	53	0.421182	1.71	35	780	187	33
			C	> 105	67	0.571387	1.74		777	191	32
Gletsch		150	A	0 - 5	30	0.141601	1.02	5	766	227	7	109.5
			AC	5 - 15	44	0.27821	1.3	10	809	169	22
			C1	15 - 25	38	0.217246	1.2	10	759	218	23
			C2	25 - 35	33	0.194602	1.3	10	819	171	10
		260	A	0 - 5	35	0.156051	0.91	5				117.75
			BC	5 - 15	59	0.398494	1.22	10
			BC	15 - 25	45	0.276854	1.24	10
			(B)C	25 - 35	41	0.264305	1.37	10
			C	35 - 45	50	0.366029	1.53	10
		300	A	0 - 5	29	0.0580726	0.4	5				121.875
			BC	5 - 15	57	0.420397	1.45	10
			BC	15 - 25	61	0.490334	1.63	10
			(B)C	25 - 35	71	0.610985	1.7	10
			C	35 - 45	73	0.634296	1.7	10
		450	A	0 - 5	52	0.204801	0.63	5				126
			B1	5 - 15	56	0.333105	1.04	10	771	170	59
			B2	15 - 25	63	0.393555	1.01	10	900	91	9
			BC	25 - 35	65	0.495238	1.4	10	871	120	9
			C	35 - 45	41	0.283653	1.51	10	813	180	7
		700	A	0 - 5	49	0.145594	0.47	5				116.25
			Bw	5 - 15	42	0.216296	1.01	10
			Bw	15 - 25	42	0.214614	1	10
			B	25 - 35	38	0.204281	1.11	10
			BC	35 - 45	30	0.153355	1.12	10
		3000	Ah	0 - 5	11	0.00969936	0.21	5				111.375
			Bw	5 - 15	34	0.121282	0.71	10
			Bw	15 - 25	53	0.281346	0.92	10
			bBw	25-35	45	0.270338	1.2	10
			bBw	35-45	83	0.757991	1.7	10
		10500	O	0 - 10	6	0.0142461	0.6	10				106.5
			E	10 - 20	51	0.341431	1.32	10	654	322	24
			Bhs	20 - 30	75	0.59168	1.28	10	764	216	20
			Bs	30 - 40	66	0.47598	1.24	20	841	149	10
			Bw	50 - 60	46	0.332556	1.55	45	905	84	11
			BC	95-105	67	0.54446	1.56	10	813	80	7
			2C	120
Schmadri		3300	O	3-8	0	0	0.57	8				72.5
			E	9-14	25	0.0883028	0.77	7	538	301	161
			Bhs	16-21	27	0.159534	1.36	10	513	320	167
			Bws	28-33	72	0.630699	1.76	45
			C	75-85	79	0.728484	1.89		780	170	50
		11500	O	3-10	0	0	0.39	10				72.5
			E	10-16	7	0.0300299	1.09	6	544	326	130
			Bhs	16-22	23	0.102209	1.01	6	491	307	187
			Bs	24-30	25	0.105737	0.94	6
			Bw	55-60	26	0.16956	1.54	60	737	213	50
			C	95-105	42	0.317192	1.7		821	130	49
Val Mulix	S1	14900	O	0-13	3.1	0.00444691	0.37	13	502	386	112	82.5
			E	13-20	28.8	0.118417	0.88	7	489	377	134
			Bhs	20-23	20.9	0.0823465	0.9	3
			Bsm	23-50	60.9	0.507041	1.75	27	823	154	23
			BC	50-70	53.2	0.418827	1.68	20
			C	>70	61.2	0.510194	1.75	10	807	161	32
	S2	10000	OE	0-7	27.1	0.148173	1.24	7				82.5
			Bs	7-40	74.9	0.632741	1.53	33
			Bsm	40-60	69.2	0.594608	1.73	20
			C	>60	78.9	0.731426	1.93	10
	S3	10700	O1	0-5	25.5	0.0606637	0.5	5				80
			O2	5-10	17	0.0364903	0.49	5	494	369	137
			E	10-12	30	0.0844028	0.57	2	483	379	138
			Bhs	12-14	27.1	0.0882511	0.69	2
			Bs	14-26	50.1	0.234822	0.81	12	793	181	26
			BC	26-60	67.9	0.520515	1.36	34	814	154	32
	S4	9600	O	0-9	2.4	0.00222209	0.24	9				82
			OE	9-18	5.8	0.00920818	0.4	9
			Bs	18-30	56.6	0.393797	1.32	12
			BC	30-50	66.1	0.502001	1.37	20
			C	>50	75.3	0.634652	1.51	10
	S5	8600	O1	0-5	2.6	0.00331315	0.33	5				82
			O2	5-10	12.4	0.017322	0.33	5
			E	10-15	36.5	0.13182	0.7	5
			Bhs	15-25	67.3	0.391954	0.83	10
			Bs	25-35	64.3	0.447149	1.19	10
			BC	>35	72.5	0.605067	1.54	10
Val di Rabbi	S1	17311	AE	0-4	4.6	0.0161121	0.9	4	455	280	265	46.8778
			BE	4-8	34.1	0.150881	0.91	4	515	280	205
			Bs1	8-20	10	0.0300935	0.74	12	575	286	139
			Bs2	20-45	51.1	0.31386	1.16	25	671	275	54
			BC	45-60	34	0.215132	1.41	15
	S2	11106	AE	0-9	3	0.0106231	0.92	9	397	398	205	72
			Bhs	9-20	19	0.0820647	1.01	11	717	209	74
			Bs	20-40	58	0.421818	1.4	20	709	252	39
	S3	10754	AE1	0-4	8	0.0289947	0.91	4	457	223	320	43.4872
			AE2	4-12	21	0.0870039	0.95	8	576	212	212
			Bhs	12-20	45	0.278465	1.25	8	638	172	190
	S4	8860	A	0-8	0	0	0.93	8	352	496	152	96
			Bw1	8-20	1	0.00353236	0.93	12	409	437	154
			Bw2	20-32	32	0.121661	0.78	12	692	258	50
			Ab	32-35	2	0.00627535	0.82	3	309	498	193
			Bbw	35-40	49	0.330244	1.36	5	839	136	25
	S5	10837	AE	0-11	6.8	0.0241802	0.9	11	437	302	261	44.4105
			Bs1	11-26	15.8	0.0667453	1.01	15	551	344	105
			Bs2	26-50	47.1	0.329101	1.46	24	663	258	79
	S6	4729	AE	8-17	54	0.27587	0.86	17	438	417	145	34.1506
			Bs1	17-38	67	0.493161	1.27	21	561	317	122
			Bs2	38-45	68	0.502581	1.26	7	561	317	122
			BC	45-60	56	0.361725	1.18	15	530	353	117
	S7	5452	AE	5-10	43	0.203953	0.9	11	498	290	212	39.5
			Bs1	11-25	63	0.455126	1.3	14	544	323	133
			Bs2	25-50	44	0.293333	1.4	25	536	331	133
			BC	50-60	60	0.450777	1.45	10	532	333	135
	S8	9203	AE	0-20	37	0.169362	0.92	20	486	374	140	46.5858
			Bs	20-25	59	0.373956	1.1	5	599	360	41
			BC	25-48	54	0.37423	1.35	23	632	345	23
	S9	11197	AE	0-11	16	0.0607595	0.9	11	381	416	203	37.4999
			Bs	11-23	27	0.143458	1.2	12	497	400	103
			BC	23-40	46	0.310361	1.4	17	654	310	36
Meggerwald	Podzol	19200	E	5-15	2	0.00543811	0.71	15	538	338	124	37.9624
			Bhs	15-40	9	0.0272287	0.75	25	561	316	123
			Bw	40-65	27	0.173114	1.5	30	623	271	106
			BC	70-90	5	0.0296782	1.54	60	483	353	164
			2C	150-160	42	0.275273	1.39	30
	Cambisol	19200	A	0-20	13	0.0467626	0.87	20	478	351	172	44.9732
			Bw1	20-40	20	0.0947908	1.11	20	462	389	149
			Bw2	40-80	26	0.158441	1.42	40	489	375	136
			BC	80-130	9	0.0560166	1.59	50	626	275	99
			2C	>130	0	0	1.59	20
Lys Glacier	A2	64	AC	0-7	62	0.496248	1.6	7	823	166	11	136.627
			C1	7-16	69	0.60189	1.8	9	834	155	11
			C2	16-35+	69	0.60189	1.8	29	815	175	10
	A3	64	OL	0-0.5			0.3	0.5				132.192
			A	0-8	64	0.501567	1.5	8	812	170	18
			AC	8-25	77.5	0.700565	1.8	17	818	167	15
			C	25-48+	77.5	0.700565	1.8	23	829	156	15
	A4	193	OF	0-3			0.3	3				119.433
			A	4-14	60	0.404494	1.2	10	785	194	21
			AB	14-17	69	0.60189	1.8	3	792	188	20
			BC	17-37	62	0.496248	1.6	20	812	172	16
			C	37-45+	60	0.504673	1.8	8	806	180	14
	A5	259	OL	0-1			0.2	1				160.619
			OF	1-3			0.3	2
			A1	3-10	37	0.196003	1.1	7	795	179	26
			A2	10-22	37	0.196003	1.1	12	813	168	19
			Bw	22-40	47	0.303151	1.3	18	846	143	11
			C	40-50+	42	0.30421	1.6	10	942	53	5
	A6	11000	OL-OF	0-6			0.3	6				105.9
			A	6-12/16	10	0.0479042	1.2	8	692	256	52
			BA	12/16-48	56	0.402051	1.4	34	730	223	47
			Bw	48-72	56	0.402051	1.4	24	841	124	35
			IIBC	72-106+	17	0.103891	1.5	34	821	162	17
Wind River Range
Bigfoot Lake	BFL9	150	Cox	0-5	42	0.269487	1.35	5	840	120	50	115.462
			Cu1	5-15	56	0.459485	1.77	10	840	110	50
			Cu2	15-25	56	0.459485	1.77	10	840	110	50
	BFL7	9930	A	0-7	17.3	0.0898123	1.25	7	635	243	122	51.1352
			2Bw	7-15	28.8	0.169805	1.34	8	725	178	97
			2Cox1	15-30	28.1	0.167064	1.36	15	733	171	96
			2Cox2	30-45+	29.5	0.218436	1.77	15	705	196	99
	BFL 6	9930	A	0-10	7	0.0270814	0.98	10	570	239	191	48.0304
			2Bt	10-20	29	0.156089	1.2	10	667	212	121
			2Cox1	20-28	34	0.230397	1.54	8	683	219	98
			2Cox2	28-45	33	0.247542	1.77	17	745	169	86
	BFL5	12930	A	0-9	22	0.0909491	0.94	9	631	230	139	68.1029
			2Bt	9-22	31	0.176017	1.26	13	637	240	123
			2Cox1	22-55	32	0.22341	1.62	33	702	200	98
			2Cox2	55-75	46	0.36264	1.77	20	829	120	51
	BFL4	12930	OA	0-5	19.7	0.103719	1.25	5	717	171	111	67.0049
			Bt	5-13	32.3	0.204744	1.43	8	644	250	106
			2Cox1	13-37	53	0.395887	1.54	24	746	186	69
			2Cox2	37-63+	44.3	0.346927	1.77	26	736	192	72
	BFL3	14500	A	0-12	11	0.0445615	1	12	652	197	151	63.6463
			AB	12-23	18	0.0793153	1.04	11	635	215	150
			Bt	23-60	24.4	0.132126	1.25	37	577	309	114
			Cox1	60-72	36	0.246356	1.54	12	647	241	112
			2Cox2	72+	53	0.429612	1.77	10	780	160	60
	BFL2	14500	A	0-5	14	0.0562365	0.97	5	565	254	180	51.8035
			AB	5-18	15	0.0774114	1.26	13	662	203	135
			Bt	18-60	29	0.184721	1.47	42	637	230	133
			2Cox1	60-80	30	0.199396	1.54	15	751	175	74
			3Cox2	80+	53	0.429612	1.77		781	158	61
	BFL1	14500	A	0-8	8	0.0381884	1.21	8	574	282	144	53.0381
			Bt	8-18	20	0.106992	1.27	10	628	200	171
			2BC	18-28	40	0.249292	1.32	10	801	161	38
			2Cox1	27-65	43	0.292174	1.45	38	605	300	95
			2Cox2	65-90	53	0.429612	1.77	25	781	158	61
Stough Creek Basin	SCB1	16000	A	0-6	12.4	0.0535869	1.06	6	560	267	173	37.8344
			E	6-10	7.5	0.0325604	1.1	4	509	366	125
			2Bs1	10-22	16.4	0.0920789	1.37	12	683	227	90
			2Bs2	22-40	17	0.0957491	1.37	18	674	282	46
			2Cox1	40--60	35.7	0.243942	1.54	20	659	322	20
			2Cox2	60-80+	31.5	0.234976	1.77	20	652	341	7
	SCB2	14500	A	0-9	16	0.0670578	1	9	591	224	184	72
			Bt	9-22	17	0.0848762	1.2	14	590	260	150
			BC	22-33	20	0.115192	1.38	11	664	234	102
			2Cox	33-60+	51	0.410094	1.77	27	836	111	53
	SCB3	14500	A	0-10	4	0.0168496	1.09	10	538	260	202	57
			AB	10-26	16	0.072036	1.08	16	691	166	143
			2Bw	26-48	36	0.203008	1.2	22	761	193	46
			2Cox	48-65	36	0.246356	1.54	17	696	246	58
			2Cu	65-80+	40	0.308094	1.77	15	830	138	32
	SCB4	14500	A	0-7	3.8	0.0145424	0.99	7	520	279	201	46.4
			Bt	7-20	12.3	0.0516946	1.03	13	629	248	123
			BC	20-43	20.7	0.119668	1.38	12	627	290	83
			Cox	43-55	20.8	0.132412	1.54	12	509	382	109
			2Cu	55-65+	28.1	0.207003	1.77	10	790	171	39
	SCB5	14500	A	0-10	13	0.0563991	1.06	10	667	184	149	58
			Bt	10-25	8.4	0.0395512	1.19	15	625	205	170
			2BC	25-52	36.4	0.229609	1.38	27	767	176	57
			2Cox	52-62	36.8	0.252828	1.54	10	673	255	72
			2Cu	62+	28.1	0.207003	1.77	10	790	171	39
	SCB6	9930	A	0-5	13.6	0.0592334	1.06	5	398	414	188	25.8866
			Bt	5-17	13.8	0.0591148	1.04	12	462	393	144
			2Cox1	17-30	37	0.254455	1.54	13	641	279	81
			2Cox2	30-50+	43.2	0.33687	1.77	20	656	274	70
	SCB7	9930	A	0-5	12.3	0.0488303	0.97	5	656	242	103	67.7888
			Bw	5-15	15.8	0.0710426	1.08	10	690	239	70
			2Cox1	15-25	44.7	0.319607	1.54	10	727	215	58
			2Cox2	25-50+	47.9	0.380452	1.77	25	801	153	46
	SCB8	12930	A	0-7	11.3	0.0454309	0.99	7	492	354	154	49.6558
			Bt	7-15	14.9	0.0677539	1.1	8	551	323	125
			2Cox1	15-39	50.8	0.375012	1.54	24	841	143	15
			2Cox2	39-50+	59	0.490098	1.77	11	834	164	2
	SCB9	12930	A	0-5	8	0.0317712	1	5	618	264	118	62.4944
			2Bt	5-11	22.1	0.104497	1.09	6	622	290	88
			2Cox1	11-35	24.9	0.161551	1.54	24	693	303	4
			2Cox2	35-50+	45	0.353372	1.77	15	804	195	1
	SCB10	16000	A	0-6	3	0.0110799	0.96	6	168	501	331	48
			Ej	6-7	3	0.0126752	1.1	1	237	495	268
			Bw	7-11	4	0.0150225	0.97	4	413	321	266
			2ABb	11-23	17	0.0724106	1.01	12	577	225	198
			2Btb	23-29	22	0.113256	1.2	6	745	164	94
			3Cox1b	29-75	37	0.254455	1.54	46	872	83	45
			3Cox2b	75-85	46	0.36264	1.77	10	798	138	64
	SCB11	14500	A	0-9	3.6	0.0138964	1	9	519	309	172	55.0085
			Bt	9-20	5.1	0.0202659	1.02	11	431	365	204
			2BC	20-30	31.6	0.211653	1.54	10	779	158	63
			2Cox1	30-45	33.9	0.243148	1.66	10	779	189	31
			2Cox2	45-55+	23	0.166326	1.77	15	851	131	17
	SCB12	1500	A	0-2	31	0.186248	1.35	2	800	150	60	89
			Cox	2-10	47	0.371982	1.77	8	830	120	60
			2Cv	10-30	51	0.410094	1.77	20	920	40	50
	LC1	16000	O	0-3				3	--	--	--	41
			E	3-6	16.8	0.0773351	1.1	3	657	226	117
			Bs1	6-18	15.9	0.0890381	1.37	12	601	334	65
			Bs2	18-45	16.7	0.0939111	1.37	27	650	283	66
			2Coxx	45-80	37.3	0.2569	1.54	35	735	180	85
			2Cu	80+	31.5	0.234976	1.77	10	652	341	7
	WL1	16000	AO	0-5	31	0.148664	1.03	5	787	140	73	78.5
			Ej	5-9	11.3	0.0502253	1.1	4	509	372	118
			Bw	9-30	27.5	0.143446	1.17	21	629	232	139
			2BCx	30-52	37.9	0.261812	1.54	22	653	225	122
			2Coxx	52-68	26.6	0.194882	1.77	16	678	221	101
			2Cu	68+	30.1	0.223372	1.77	10	677	230	93
	IL1	12930	A	0-15	7.9	0.0322638	1.03	15	481	330	189	39
			2Bt	15-35	25	0.128289	1.17	20	525	304	171
			2BC	35-55	40	0.279238	1.54	20	703	232	65
			2Cox	55+	43.4	0.338692	1.77	10	723	197	80
Roaring Fork Pass	RFP1	16000	A1	0-5	2.6	0.0102689	1.03	5	348	330	322	25
			A2	5-13	2.3	0.00906711	1.03	8	386	354	261
			Bw1	13-24	17	0.0829303	1.17	9	617	231	152
			Bw2	24-32	23.6	0.120015	1.17	8	691	190	119
			Bw3	32-59	36.7	0.226707	1.34	27	773	142	85
			2BC1	59-92	41.8	0.272205	1.38	33	857	78	65
			3BC2	92-120	38.8	0.269236	1.54	28	683	188	129
			4Cox	120+	42	0.325995	1.77	10	725	197	78
	RFP2	16000	A	0-13	6	0.0242087	1.03	13	398	363	239	37.5
			2Bt1	13-23	17	0.0829303	1.17	10	623	222	154
			2Bt2	23-50	35	0.214009	1.34	27	680	198	122
			2BC	50-60	33	0.222534	1.54	10	709	204	87
			2Cox	60-75	42	0.325995	1.77	15	725	197	78
Pinedale, Bull Lake	PAF-1	22000	A	0-5	16	0.083045	1.26	5	714	190	96	84
and Sacagawea Ridge soils			Bw	5-25	24.7	0.152171	1.45	20	721	207	72
			Cox	25-50	33.4	0.250917	1.77	25	759	187	55
			Cx	50-75	34	0.262399	1.83	70	757	191	52
			C2	75-100+	53.1	0.438787	1.83		751	181	68
	PAF-2	22000	OA	0-10	10.8	0.0519772	1.2	10	617	261	122	65.5
			A	10-25	25.1	0.137438	1.26	15	662	236	102
			Bw	25-48	26.9	0.167605	1.45	23	708	222	69
			Cx	48-60	33.2	0.255518	1.83	72	734	211	55
			C	60-100+	32.8	0.252092	1.83		737	216	47
	G-1	130000	O/A	0-10	9.4	0.0376769	1	10	527	311	162	43.6172
			A/E	10-16	32.8	0.193186	1.3	6	544	296	159
			Bt1b	16-43	44.6	0.318728	1.54	37	624	222	154
			2Bt2b	43-80+	49.1	0.3666	1.59	37	790	143	68
			2C		41.5	0.328809	1.83		813	168	19
	G-2	630000	AE	0-30	23.9	0.133499	1.3	30	588	294	119	59.3937
			Bt1	30-60	24.9	0.161551	1.54	30	550	258	192
			Bt2	60-100	25.6	0.171123	1.59	40	501	291	208
			Bt3	100-160	29.3	0.199139	1.59	60	558	264	177
			Bt41	160-200	51.7	0.391074	1.59	40	673	169	158
			Bt42	200-300	27.9	0.188429	1.59	100	577	247	176
			BC	300-350	24.1	0.160871	1.6	50	648	213	138
			CB1	350-400	33.3	0.250072	1.77	50	585	270	145
			CB2	400-450	33.1	0.248385	1.77	50	560	269	171
			CB3	450+	37.9	0.28959	1.77	50	761	158	81
			*2C(G-8)		41.5	0.328809	1.83		813	168	19
	G-3	130000	OA	0-4	14.8	0.061518	1	4	422	388	190	39.8876
			E	4-8	14	0.0739537	1.3	4	539	353	108
			Bt1	8-25	14.4	0.0890545	1.54	17	539	338	123
			Bt2	25-45	14.4	0.0916808	1.59	20	463	346	192
			2Bt2b	45-90+	32.1	0.220973	1.59	45	702	197	101
			*2C(G-8)		41.5	0.328809	1.83		813	168	19
	G-5	65000	OA	0-6				6				59.5133
			ABw	6-25	22.9	0.131425	1.35	19	606	259	135
			Bt1	25-60	31.7	0.212425	1.54	35	192	293	515
			Bt2	60-90	27.4	0.184636	1.59	30	470	313	216
			Cox	90-140	24.1	0.174973	1.77	50	699	212	89
			2C	140+	37	0.288545	1.83		797	155	48
	G-7	65000	A	0-20	23	0.124362	1.26	20	622	235	142	61.7864
			Bt	20-40	44.5	0.31785	1.54	20	698	178	124
			2BC	40-70	52.4	0.399276	1.6	30	873	76	51
			2Cox	70-140	32.1	0.239985	1.77	70	828	120	52
			*2C(G-5)	140+	37	0.288545	1.83		797	155	48
	G-8	22000	O	0-2				2				49.6116
			A	2-6	24.8	0.13555	1.26	4	513	335	152
			Bw	6-20	21.2	0.128319	1.45	14	601	282	116
			2Cox	20-50	38.9	0.298365	1.77	100	785	174	41
			2C	50+	41.5	0.328809	1.83		813	168	19
	SC-1	65000	A	0-5	5	0.0261122	1.35	5	563	303	134	35
			Bw	5-20	45.8	0.311675	1.42	15	736	119	145
			Bt1	20-35	53.2	0.397809	1.54	15	726	114	160
			Bt2	35-80	53.1	0.40452	1.59	45	661	145	194
			Cox1	80-100	54.9	0.448447	1.77	20	645	153	203
			Cox2	100-135	52	0.419814	1.77	35	717	88	196
			C	135+	47.2	0.381695	1.83		753	89	158
	SC-2	22000	A	0-15	13.4	0.06853	1.26	15	680	170	150	34
			Bw	15-30	42.7	0.289647	1.45	15	501	294	205
			BC	30-65	50.7	0.383066	1.6	35	770	108	122
			Cox	65-120	39	0.299246	1.77	55	662	151	187
			2C	120+	27.8	0.210046	1.83		781	158	61
	HR-1	630000	A	0-15	27.6	0.16363	1.36	15	660	202	138	88.5
			Bt1	15-60	43.9	0.316759	1.57	45	770	88	142
			2Bt2	60-100	29.6	0.204476	1.62	40	800	97	102
			2Cox1	100-120	24.1	0.174973	1.77	20	782	145	73
			2Cox2	120-230+	18.4	0.130896	1.77	90	797	136	67
	HR-2	130000	Ak	0-15	18.5	0.0974152	1.26	15	727	171	103	64.0212
			Btk	15-45	32.9	0.221751	1.54	30	682	198	119
			BCk	45-90	19.6	0.128304	1.6	45	708	202	90
			Coxk	90-170	16.6	0.117344	1.77	80	703	208	89
			Ck	170-300+	19.4	0.142526	1.83		707	203	89
	WD-1	850000	Ak	0-5	23.1	0.133571	1.36	5	535	345	121	32
			Btk	5-30	19.1	0.12271	1.57	25	502	363	135
			Btkb	30-55	10.9	0.066776	1.55	25	389	464	147
			BCkb	55-80	22.2	0.146965	1.6	25	500	398	102
			Coxkb	80-140+	17.2	0.121842	1.77	60	452	433	115
			Cb		17.9	0.127114	1.77		402	479	119
Pete's Lake Road	PLR1	130000	A	0-8	18.4	0.0968324	1.26	8	483	367	150	43
			Bt1b	8-30	16.5	0.103006	1.54	22	501	325	174
			Bt2b	30-50	12.4	0.0782828	1.59	20	496	297	207
			Bt3b	50-85	7.5	0.0463918	1.59	35	336	406	258
			2Coxb	85-100	53.1	0.430596	1.77	15	729	174	98
	PLR2	22000	A	0-10	20.5	0.109215	1.26	10	583	273	145	60.5
			AB	10-20	23.1	0.132719	1.35	10	625	250	125
			Bw	20-30	40.7	0.273015	1.45	10	691	227	82
			Cox	30-50	41.6	0.322393	1.77	20	740	207	52
			2C	> 50	52.8	0.435824	1.83	10	773	185	42
Fairfield Creek	FC 6	65000	A	0-5	16.2	0.0841794	1.26	5	595	253	151	64.5
			Bw	5-15	21.6	0.131002	1.45	10	593	264	143
			Bt1	15-30	27.3	0.179133	1.54	15	625	244	131
			Bt2	30-45	26.3	0.176352	1.59	15	687	213	100
			Coxx	45-65	32.5	0.243338	1.77	20	720	202	78
			*C(FC-4)	65+	39.6	0.311653	1.83		807	117	77
	FC5	65000	A	0-7	16.2	0.0841794	1.26	7	587	192	221	57.8631
			Bt1	7-25	27.3	0.179133	1.54	18	650	148	203
			2Bt2	25-50	26.3	0.176352	1.59	25	703	126	171
			2Coxx	50-85	32.5	0.243338	1.77	35	689	163	148
			2C	> 85	39.6	0.311653	1.83	10	807	117	77
	FC-4	22000	A	0-7	16.9	0.0881706	1.26	7	682	208	111	88.5
			Bw	7-33	21.8	0.132348	1.45	26	674	234	92
			2Bw	33-52	31.4	0.21333	1.57	19	770	173	57
			2Cox	52-100	44.8	0.351527	1.77	68	758	208	34
			2C	100+	39.6	0.311653	1.83		807	117	77
	FC 3	65000	OA	0-3				3	--	--	--	83
			E	3-15	19.6	0.114096	1.4	12	639	267	94
			Bt	15-50	36.3	0.248777	1.54	35	709	222	70
			Cox	50-75	64.6	0.54932	1.77	25	720	225	55
			Btb	75-90	21.1	0.144224	1.67	15	553	278	169
			Coxb	90-130	23.1	0.167109	1.77	40	717	221	62
			Cb	130-140+	44.7	0.358233	1.83	10	742	203	55
	FC2	630000	A	3-5	11	0.0475325	1.07	5	561	231	208	47
			Bt1	5-23	22.1	0.131151	1.41	18	701	119	181
			2Bt2b	23-45	16.3	0.104032	1.58	22	744	88	168
			2Bt3b	45-130	12.5	0.0789474	1.59	85	750	85	165
			2Coxb	130-210	2.6	0.0175173	1.77	80	765	94	141
			2Cb	> 210	39.6	0.311653	1.83	10	807	117	77
	FC 1	130000	Ak	0-8			1.26	8
			Abk	8-20			1.26	12
			Bwk	20-40			1.45	20
			Btk1	40-62			1.54	22
			Btk2	62-130+			1.6	68
Deer Spring	DS1	850000	A	0-11	14.5	0.0773507	1.31	11	609	203	188	30
			Btb1	11-30	20.1	0.122458	1.47	19	606	154	241
			2Bt2b	30-150	36.2	0.246757	1.53	120	656	116	228
Table Mountain	TM-1	1200000	A	0-12	0	0	1.26	12	718	161	122	84.5
			B	12-20	0.7	0.00484446	1.83	8	759	128	113
			Bt1b1	20-45	0	0	1.54	15	684	175	141
			Bt2b1	45-60	2	0.0120968	1.59	15	686	179	135
			Coxb1	65-85	1.2	0.00804716	1.77	20	725	155	120
			ABb2	85-115	5.2	0.0254178	1.26	30	666	181	153
			Bt1b2	115-150	17.9	0.112454	1.54	35	630	194	176
			Bt2b2	150-200	18.4	0.115858	1.54	50	724	136	140
			Bt3b2	200-300	11.6	0.0729866	1.59	100	678	186	135
			Cox1b2	300-400	18.5	0.131654	1.77	100	724	167	109
			Cox2b2	400-500	16.1	0.11361	1.77	100	713	168	119
Wind River Range	P1 Alice Lake	11845.5	A1	0-15	25	0.111732	1	15	592	332	76	85.5
			2A2	15-28	30	0.147518	1.07	13	539	374	87
			2Bw	28-43	35	0.175837	1.05	15	515	380	105
			3Cox/Bw	43-70+	40	0.243578	1.28	27	761	172	68
	P2 Temple Lake	15549.5	A	0-17	3	0.00936488	0.81	17	529	335	136	49.3333
			2Bwg1	17-40	5	0.0123578	0.63	23	428	386	186
			3Bwg2	40-78+	45	0.219336	0.91	38	590	354	56
	P3 Lonesome Lake	15760	O	0-5	1			5				59.5
			A	5-17	7	0.0208582	0.75	12	263	348	389
			2EB	17-30	20	0.0774587	0.89	13	408	367	226
			3Bs	30-45	40	0.225901	1.16	15	709	289	2
			3Cox/B	> 45	50	0.383721	1.65	20	789	208	3
Popo Agie, Wind River Range	Little Popo Agie - Red Canyon
	RCT2	20000	A	0-9	0.6	0.3	1.2	9	272	492	236	19.3672
			Bw1	9-21	0.9	0.5	1.4	12	221	513	266
			Bw2k	21-40	0.1	0.1	1.5	19	250	491	259
			CBk	40-60	0.2	0.2	1.7	20	264	495	242
			CK	60-90+	1	0.7	1.8	30	259	632	109
	RCT3	160000	A	0-7	14.2	7	1.2	7	391	449	161	33.2707
			AB	7-30	13.2	7.4	1.4	23	373	422	205
			Bk1	30-50	22.3	14	1.5	20	385	442	173
			Bk2	50-100	32.1	23.3	1.7	50	606	347	47
			2C	100+	25.8	19.1	1.8		550	360	80
	RCT4	260000	A	0-10	23.3	12.1	1.2	10	355	461	185	32.177
			Bw1	10-18	14.7	8.4	1.4	8	409	416	175
			Bw2	18-30	34.2	22.8	1.5	12	270	494	236
			Bk1	30-50	33.9	21.3	1.4	20	225	470	305
			Bk2	50-100	14.6	9.4	1.6	50	272	417	311
			Ck	100-125	54.3	44.7	1.8	25	481	442	78
			C	125+	49.4	39.8	1.8		554	362	84
	RCT5	660000	A	0-15	6.6	3.1	1.2	15	324	471	204	42.9324
			AB	15-25	30.6	17.8	1.3	10	521	305	174
			Bk	25-40	68.4	56.6	1.6	15	110	883	8
			Bkm	40-80	87.7	81.1	1.6	40
			Ck	80-200	55.4	45.8	1.8	120	903	74	22
	Middle PopoAgie - Lander
	LWS-13-1	160000	A	0-13	12.8	6.2	1.2	13	358	300	342	32.1448
			Bt1	13-23	3.8	2.2	1.5	10	276	334	390
			Bt2	23-32	10.4	6.2	1.5	9	471	244	285
			Bk	32-120	37	28.5	1.8	88	719	250	30
			BCk	120-150	27.2	18.4	1.6	30	624	208	168
			C	150+	36.4	28	1.8		554	362	84
	SB	260000	A	0-10	14.9	7.3	1.2	10	599	274	128	40.4518
			Bt	10-25	6.3	3.7	1.5	15	472	281	247
			Bk1	25-60	23	13.6	1.4	35	632	218	150
			Bk2	60-100	20.9	12.2	1.4	40	713	266	21
			C	100+	36.4	28	1.8		554	362	84
	North Fork PopoAgie
	PB-13-1	5000	A	0-5	8.6	4.1	1.2	5	700	234	66	46.6667
			AB	5-18	10.3	5.3	1.3	13	693	236	71
			B	18-50	15.7	9.6	1.5	32	707	199	94
			BC	50+	15.9	9.7	1.5	20	741	169	90
	GalPD	20000	A	0-25	1	0.4	1	25	318	581	101	30.8806
			Bw	25-45	0.4	0.2	1.1	20	315	588	97
			BC	45-70	2.7	1.2	1.2	25	249	516	235
			C1	70-90		0	1.2	20	552	303	145
			C2	90-120				30
			C3	120+
	GR-13-1	160000	Ak	0-10	25.7	11.5	1	10	707	249	44	54.4762
			Btk	10-21	42.9	25.4	1.2	11	687	227	85
			Bk	21-52	43.5	31.7	1.6	31	722	204	73
			BCk	52-75	53.1	37.4	1.4	23	895	81	24
			Ck	75+	37.8	25.6	1.5		859	92	50
	GR-13-2	260000	A	0-5	8.5	3.4	1	5	664	251	85	55.9479
			Bt1	5-18	12.3	8.7	1.8	13	565	203	232
			Bt2	18-30	13.9	9.8	1.8	12	575	197	229
			Bk	30-70	41.2	27	1.4	40	737	201	63
			C2	70-90	38.6	13.1	0.6	20	929	50	21
			C3	90+	36.4	12.1	0.6		946	32	22
	PB-13-2	660000	A	0-5	9.7	3.2	0.8	5	688	249	63	53.3333
			Bt1	5-13	14.4	7.1	1.2	8	656	264	79
			Bt2	13-20	15.4	9.3	1.5	7	691	254	54
			Bt3k	20-30	22.5	16.5	1.8	10	598	231	171
			Bk1	30-50	43.8	37	2	20	761	152	87
			Bk2	50-90	40.3	33.8	2	40	715	181	104
			BCk / CBk	90+	27.9	19	1.6	20	847	130	23
Sichuan, China
	Profile 2	39	AC	0-8	20	0.118136	1.42	8	760	230	10	101.419
			C	8-56	30	0.223524	1.78	48	750	240	10
	Profile 3	70	A	0-10	20	0.120332	1.45	10	600	390	10	74.8188
			Bw	10-25	20	0.100933	1.19	15	830	260	20
			CB	25-35	20	0.128289	1.56	10	660	320	20
			C	35-70	20	0.125413	1.52	35	760	230	10
	Profile 4	98	AE	0-8	20	0.114453	1.37	8	670	330	0	101.47
			Bw	8-20	20	0.0901288	1.05	12	840	140	20
			C	20-60	20	0.112228	1.34	40	840	150	10
	Profile 5	130	E	0-4	20	0.0798611	0.92	4	860	140	0	143.311
			Bhs	4-11	30	0.143978	1.04	7	770	200	30
			C/B	11-27	20	0.117402	1.41	16	840	150	10
			C	27-55	40	0.265928	1.44	28	820	180	0
	Profile 6	159	E	0-5	20	0.105485	1.25	5	850	140	10	149.091
			Bhs	5-10	20	0.0846287	0.98	5	810	160	30
			C/B	10-26	60	0.478346	1.62	16	830	150	20
			C	26-57	50	0.390805	1.7	31	850	140	10
	Profile 7	183	A	0-7	20	0.0822511	0.95	7	740	230	30	89.5266
			E	7-13	20	0.0893471	1.04	6	650	310	40
			Bhs	13-23	20	0.10017	1.18	10	680	280	40
			Bs	23-32	20	0.106239	1.26	9	670	270	60
			C	32-70	30	0.174822	1.31	38	710	240	50
Peru							(estimated)
	J1	18918.5	A	0-7	43.6		1.6	7	36	777	187	19.6277
			AB	7-27	40.8		1.6	20	241	609	150
			Bw1	27-40	44.5		1.6	13	352	544	104
			Bw2	40-50	69.6		1.8	10	518	406	76
			Bw3	50-65+	28.9		1.8	15	670	263	67
	J2	18918.5	A	0-3	nd		nd	3				14.1514
			AB	3-13	45.7	0.363733	1.8	10	252	597	125
			Bw1	13-63	53.2	0.435708	1.8	50	274.333	595	10.6667
			Bw2	63-103+	49.2	0.428317	2.05	40	293	592.5	114
	J3	17185	A	0-3	12.8	0.0524848	1	3	220	608	172	12.5197
			2A	13-36	77.9	0.666135	1.5	23	267	592	141.5
			2Bw	36-60	57.7	0.507264	2	24	281	578	142
			2Bt	60-90+	45.7	0.376335	1.9	30	266	583	152
	J4	12250	A	0-26	9.9	0.0511455	1.3	26	175	649	176	20.6317
			2A	26-42	51.8	0.378231	1.5	16	181	659	160
			2Bw1	42-55	43.7	0.319102	1.6	13	248	631	121
			2Bw2	55-93	42.3	0.344529	1.9	38	237	600	163
			2Cox	93-130+	69.3	0.630129	2	37	556	350	94
	U1	45890	A	0-27	69.3	0.54391	1.4	27	66	724	210	8.43604
			2Bw1	27-40	0	0	1.6	13	95	684	221
			2Bw2	40-70	63.9	0.5593	1.9	30	230	623	147
			2Bt1	70-99	49.4	0.411757	1.9	29	265	593	142
			2Bt2	99-103+	41.7	0.32698	1.8	4	226	634	139
	U2	17073	A	0-10	31.2	0.181981	1.3	10	171	640	189	11.1282
			Bw	10-35	25.1	0.150412	1.4	25	175	649	176
			Bwg	35-84	51.6	0.43323	1.9	49	295.333	587	355
			Cg	84-103+	50.7	0.424408	1.9	19	257	605	138
	U3	17073	A	0-23	43.1	0.239209	1.1	23	354	510	127	22.0056
			Bw1	23-40	66.6	0.600785	2	17	423	475	103
			Bw2	40-86	55.8	0.481588	1.95	46	421	480.5	98.5
			Bw3	86-102+	51.5	0.444876	2	16	408	490	102
	U4	17073	A	0-30	29.4	0.169633	1.3	30	442.5	452	211	20.3041
			2A	30-52	60.7	0.482548	1.6	22	596	337	67
			2Bw	52-70	48.2	0.412548	2	18	578	361	61
			2Bt	70-100+	32.6	0.236807	1.7	30	279	616.5	104.5
	U5	2969.5	A	0-13	10.5	0.0423943	1	13	224	612	164	11.2219
			Bw	13-30	35	0.154601	0.9	17	196	625	179
			2Bw1	30-37	33.8	0.194092	1.25	17	194	640	166
			2Bw2	37-87+	21.2	0.139738	1.6	50	208	634.5	157.5
	U6	2969.5	A	0-6	16.8	0.0773351	1.1	6	274	579	148	19.712
			2A	6-20	64.9	0.434233	1.1	14	264	608	129
			2Bw1	20-32	53.2	0.358008	1.3	12	285	594	121
			2Bw2	32-44	52.9	0.404096	1.6	12	326	568	106
			2Cox	44-80+	48	0.37872	1.75	36	433.5	484	83
	U7	2969.5	A	0-23	51.1	0.25104	0.85	23	351	520.5	128.5	20.8489
			Cu	23-80+	84.4	0.710139	1.2	57	383.5	541.5	75
	U8	397.5	Aj	0-17	57.6	0.417824	1.4	17	443	448	109	33.9085
			Cox	17-35	18.2	0.118427	1.6	18	531	388	80
	M1	18918.5	A	0-7	22.9	0.135632	1.4	7	303	521	176	15.4678
			2AB	7-22	71	0.525764	1.2	15	319	508	173
			2Bw1	22-40	55	0.453608	1.8	18	304	517	179
			2Bw2	40-58	44.3	0.357009	1.85	18	314	536	150.5
			2Bt	58-82+	51.9	0.436183	1.9	24	287.5	556.5	155.5
	Q1	25460	A	0-12	3.6	0.0125242	0.9	12	404	474	122	25.867
			2Bw1	12-27	35.3	0.223746	1.4	15	420	462	118
			2Bw2	27-56	48.2	0.359718	1.6	29	377	497	126
			2Bt	56-95+	33.7	0.256648	1.8	39	437.5	455	107.5
	Q2	17554	A	0-12	38.4	0.260822	1.5	12	419	470	111	23.3331
			2Bw1	12-29	38.7	0.322708	2	17	339	540	121
			2Bw2	29-55	27.8	0.188626	1.6	26	327	557	117
			2Bt	55-80	49.7	0.414667	1.9	25	307	573	121
			2Cox	80-95+	20.7	0.157651	1.9	15	371	537	92
	Q3	14380.5	A	0-10	43.2	0.300947	1.5	10	629	300	71	54.2244
			Bw1	10-20	35.9	0.2527	1.6	10	594	324	82
			Bw2	20-34	41.3	0.310987	1.7	14	550	358	92
			Cox1	34-49	47.1	0.389638	1.9	15	622	302	77
			Cox2	49-85	42.3	0.344529	1.9	36	576	325	99
	Q4	12763.5	A	0-15	53.2	0.407	1.6	15	481	399	84	29.0558
			Bw1	15-35	54.1	0.400178	1.5	20	517	399	84
			Bw2	35-70	61.4	0.519336	1.8	35	466.5	438.5	95
			Cu	70-94+	56.1	0.490953	2	24	418	467	114
Sila, Italy
	Sila I	51600	A1	0-20	2	0.00665545	0.87	20	371	380	249	64.5
			A2	20-40	2	0.00741477	0.97	20	489	357	154
			Bw	40-60	5	0.0219503	1.13	20	607	334	59
			2Bw	60-80	5	0.0264888	1.37	20	658	279	63
			2C	80-100	10	0.054322	1.37	20	709	224	67
	Sila II	46600	A1	0-20	10.9	0.0398902	0.9	20	371	380	249	64.5
			A2	20-40	15.1	0.0527665	0.83	20	489	357	154
			Bw	40-60	15.8	0.0728722	1.11	20	607	334	59
			2Bw	60-80	20.4	0.121493	1.43	20	658	279	63
			2C	80-100	21	0.10664	1.19	20	709	224	67
